# Supplementary material for: Accurate, Model-Based Tuning of Synthetic Gene Expression Using Introns in S. cerevisiae
Source: PLoS Genet. 2014 Jun 26;10(6):e1004407. doi: 10.1371/journal.pgen.1004407 (PMC4072511; doi:10.1371/journal.pgen.1004407)
Supplement: Table S6 — Feature summary. This table summarizes the all features that were constructed and their correlation (Spearman) with the measured average and maximal expression levels. Each feature correlation p-value and empirical p-value is also presented. Some of the features are a bundle of a singular sub-features (e.g. FE in different intronic locations); in this case the bundle best location is also presented. The spliced Introns are divided into 2 subgroups: ribosomal and non-ribosomal. (XLSX) [file pgen.1004407.s016.xlsx]

## Sheet: 6.Feature Sum
Feature Name	Feature Description		Average Expression												Maximal Expression												2 sample t-test
			Spliced Introns				Spliced Ribosomal Introns				Spliced Non-Ribosomal Introns				Spliced Introns				Spliced Ribosomal Introns				Spliced Non-Ribosomal Introns				Spliced / Not-Spliced
	Bundled	Detailed Description	best corr	bundle best location	P-Value	Empirical P-Value	best corr	bundle best location	P-Value	Empirical P-Value	best corr	bundle best location	P-Value	Empirical P-Value	best corr	bundle best location	P-Value	Empirical P-Value	best corr	bundle best location	P-Value	Empirical P-Value	best corr	bundle best location	P-Value	Empirical P-Value	Spliced mean	Not-Spliced mean	Null Hypothesis	P-Value
Int Len	No	Intron Length in nucleotide bases.	--	--	N/S	N/A	--	--	N/S	N/A	--	--	N/S	N/A	--	--	N/S	N/A	--	--	N/S	N/A	--	--	N/S	N/A			0	N/S
Bnch Len	No	Number of nucleotides from the 5'SS to the BP location.	--	--	N/S	N/A	--	--	N/S	N/A	--	--	N/S	N/A	--	--	N/S	N/A	--	--	N/S	N/A	--	--	N/S	N/A			0	N/S			This table summarizes the all features that were constructed and their correlation (spearman) with the measured average and maximal expression levels. Each feature correlation p-value and empirical p-value is also presented. Some of the features are a bundle of a singular sub-features (e.g. FE in different intronic locations); in this case the bundle best location is also presented. The spliced I…
Start BP 2D Len	No	Minimal 2D distance from the 5'SS to the BP location.	--	--	N/S	N/A	--	--	N/S	N/A	--	--	N/S	N/A	--	--	N/S	N/A	--	--	N/S	N/A	--	--	N/S	N/A			0	N/S
BP End 2D Len	No	Minimal 2D distance from the BP location to the 3'SS.	--	--	N/S	N/A	--	--	N/S	N/A	--	--	N/S	N/A	--	--	N/S	N/A	--	--	N/S	N/A	--	--	N/S	N/A			1	0.02935
FE Avg Win A	No	Mean folding energy prediction. Sliding window size is 30bp.	--	--	N/S	N/A	--	--	N/S	N/A	0.219148	--	0.0360234	N/A	--	--	N/S	N/A	--	--	N/S	N/A	--	--	N/S	N/A			1	0.0119143
FE Avg Win B	No	Mean folding energy prediction. Sliding window size is 40bp.	--	--	N/S	N/A	--	--	N/S	N/A	0.249773	--	0.0165525	N/A	--	--	N/S	N/A	--	--	N/S	N/A	--	--	N/S	N/A			1	0.00514605			Features Corrlation
FE Avg Win C	No	Mean folding energy prediction. Sliding window size is 50bp.	0.152545	--	0.0421599	N/A	--	--	N/S	N/A	0.265185	--	0.0108203	N/A	--	--	N/S	N/A	--	--	N/S	N/A	0.203767	--	0.0515342	N/A			1	0.00279807			Negative Correlation		No Correlation	Positive Correlation
FE Max Win A	No	Minimal folding energy prediction (strongest folding). Sliding window size is 30bp.	--	--	N/S	N/A	--	--	N/S	N/A	--	--	N/S	N/A	--	--	N/S	N/A	--	--	N/S	N/A	--	--	N/S	N/A			0	N/S			-0.5	-0.25	0	0.25	0.5
FE Max Win B	No	Minimal folding energy prediction (strongest folding). Sliding window size is 40bp.	--	--	N/S	N/A	--	--	N/S	N/A	--	--	N/S	N/A	--	--	N/S	N/A	--	--	N/S	N/A	--	--	N/S	N/A			0	N/S
FE Max Win C	No	Minimal folding energy prediction (strongest folding). Sliding window size is 50bp.	--	--	N/S	N/A	--	--	N/S	N/A	--	--	N/S	N/A	--	--	N/S	N/A	--	--	N/S	N/A	--	--	N/S	N/A			0	N/S
FE Max Itvl Win A	No	Minimal folding energy prediction from the joint Intervals of 5'SS, BP and 3'SS. Sliding window size is 30bp.	0.229651	--	0.00204471	0.005	0.240846	--	0.025495	N/A	0.24181	--	0.020221	N/A	0.238626	--	0.00133798	0.005	0.316505	--	0.00298847	0.005	0.226095	--	0.0302254	N/A			0	N/S			Features Significance Level (P-value)
FE Max Itvl Win B	No	Minimal folding energy prediction from the joint Intervals of 5'SS, BP and 3'SS. Sliding window size is 40bp.	--	--	N/S	N/A	--	--	N/S	N/A	--	--	N/S	N/A	--	--	N/S	N/A	--	--	N/S	N/A	--	--	N/S	N/A			0	N/S			Very High		High		Low		Not Significant
FE Max Itvl Win C	No	Minimal folding energy prediction from the joint Intervals of 5'SS, BP and 3'SS. Sliding window size is 50bp.	--	--	N/S	N/A	--	--	N/S	N/A	--	--	N/S	N/A	--	--	N/S	N/A	--	--	N/S	N/A	--	--	N/S	N/A			0	N/S			(Pval < 1e-3)		(1e-3 < Pval < 0.01)		(0.01 < Pval < 0.05)		(Pval > 0.05)
FE K Mean Win A	No	Folding energy prediction sorted in a descending order and mean of the K=10 lowest values, i.e.strong solding. Sliding window size is 30bp.	--	--	N/S	N/A	--	--	N/S	N/A	--	--	N/S	N/A	--	--	N/S	N/A	--	--	N/S	N/A	--	--	N/S	N/A			0	N/S			3.74264e-05		0.00247831		0.0103766		N/A
FE K Mean Win B	No	Folding energy prediction sorted in a descending order and mean of the K=10 lowest values, i.e.strong solding. Sliding window size is 40bp.	--	--	N/S	N/A	--	--	N/S	N/A	--	--	N/S	N/A	--	--	N/S	N/A	--	--	N/S	N/A	--	--	N/S	N/A			0	N/S
FE K Mean Win C	No	Folding energy prediction sorted in a descending order and mean of the K=10 lowest values, i.e.strong solding. Sliding window size is 50bp.	--	--	N/S	N/A	--	--	N/S	N/A	--	--	N/S	N/A	--	--	N/S	N/A	--	--	N/S	N/A	--	--	N/S	N/A			0	N/S
FE LA Win A	Yes	Folding energy prediction for all sliding window locations. Alignment to the 5'SS. Sliding window size is 30bp.	0.297212	24	5.60651e-05	0.005	0.235703	16	0.0289101	N/A	0.446381	24	8.2008e-06	0.005	0.293574	29	6.97421e-05	0.005	0.238127	55	0.0272547	N/A	0.430566	24	1.83496e-05	0.005			1	1.7082e-19			Empirical Significance Level
FE LA Win B	Yes	Folding energy prediction for all sliding window locations. Alignment to the 5'SS. Sliding window size is 40bp.	0.338897	23	3.70519e-06	0.005	0.256079	12	0.0173192	N/A	0.45298	23	5.78963e-06	0.005	0.304148	23	3.66797e-05	0.005	0.303126	68	0.00455382	0.16	0.42596	23	2.30282e-05	0.005			1	4.4208e-21			Very High	High	Low	Not Significant
FE LA Win C	Yes	Folding energy prediction for all sliding window locations. Alignment to the 5'SS. Sliding window size is 50bp.	0.323839	32	1.03596e-05	0.005	0.333377	32	0.00170906	0.08	0.379338	28	0.000192148	0.005	0.288153	30	9.60307e-05	0.005	0.293551	32	0.00608514	0.17	0.348157	30	0.000671882	0.03			1	2.6914e-21			0.005	0.02	0.05	0.06	0.12
FE BP Win A	Yes	Folding energy prediction for all sliding window locations. Alignment to the BP. Sliding window size is 30bp.	0.162783	30	0.0299318	N/A	--	--	N/S	N/A	0.289085	30	0.00519264	0.06	0.168818	30	0.024282	N/A	--	--	N/S	N/A	0.269466	30	0.00938994	0.1			1	0.0026479
FE BP Win B	Yes	Folding energy prediction for all sliding window locations. Alignment to the BP. Sliding window size is 40bp.	--	--	N/S	N/A	0.211332	10	0.0507888	N/A	--	--	N/S	N/A	--	--	N/S	N/A	0.20248	10	0.0615306	N/A	--	--	N/S	N/A			1	7.0414e-05
FE BP Win C	Yes	Folding energy prediction for all sliding window locations. Alignment to the BP. Sliding window size is 50bp.	--	--	N/S	N/A	0.209842	25	0.0524804	N/A	--	--	N/S	N/A	--	--	N/S	N/A	0.22563	25	0.0367253	N/A	--	--	N/S	N/A			1	0.00028347
FE RA Win A	Yes	Folding energy prediction for all sliding window locations. Alignment to the 3'SS. Sliding window size is 30bp.	--	--	N/S	N/A	0.23606	42	0.0286606	N/A	-0.20446	55	0.0505821	N/A	--	--	N/S	N/A	0.228194	42	0.0345848	N/A	--	--	N/S	N/A			1	8.4362e-22
FE RA Win B	Yes	Folding energy prediction for all sliding window locations. Alignment to the 3'SS. Sliding window size is 40bp.	0.192969	11	0.00986044	0.14	0.312387	53	0.003409	0.1	0.242373	11	0.0199229	N/A	0.207441	18	0.00546282	0.1	0.308734	53	0.00382564	0.11	0.248463	11	0.0169326	N/A			1	6.3565e-25
FE RA Win C	Yes	Folding energy prediction for all sliding window locations. Alignment to the 3'SS. Sliding window size is 50bp.	0.180839	30	0.0157074	N/A	0.222433	73	0.0395481	N/A	0.208789	7	0.0457904	N/A	0.181983	38	0.0150492	N/A	0.251212	37	0.0196426	N/A	--	--	N/S	N/A			1	3.2398e-12
GC LA Win A	Yes	GC content percentage calculation. Alignment to the 5'SS. Sliding window size is 30bp.	-0.272953	21	0.000227591	0.005	-0.384499	11	0.000257098	0.005	-0.284338	21	0.00601558	0.06	-0.251514	8	0.000707697	0.03	-0.309043	11	0.00378873	0.08	-0.253217	21	0.0148755	N/A			1	1.2891e-17
GC LA Win B	Yes	GC content percentage calculation. Alignment to the 5'SS. Sliding window size is 40bp.	-0.272953	21	0.000227591	0.005	-0.384499	11	0.000257098	0.005	-0.284338	21	0.00601558	0.1	-0.251514	8	0.000707697	0.03	-0.309043	11	0.00378873	0.03	-0.253217	21	0.0148755	N/A			1	0.0025395
GC LA Win C	Yes	GC content percentage calculation. Alignment to the 5'SS. Sliding window size is 50bp.	-0.272953	21	0.000227591	0.005	-0.384499	11	0.000257098	0.005	-0.284338	21	0.00601558	0.12	-0.251514	8	0.000707697	0.03	-0.311429	46	0.00351416	0.06	-0.253217	21	0.0148755	N/A			1	0.0025395
GC RA Win A	Yes	GC content percentage calculation. Alignment to the 3'SS. Sliding window size is 30bp.	-0.264108	23	0.000367656	0.005	-0.243247	20	0.0240219	N/A	-0.400722	7	7.55006e-05	0.005	-0.254277	23	0.000614679	0.01	-0.274372	20	0.0105747	N/A	-0.41588	14	3.74264e-05	0.005			1	9.2101e-10
GC RA Win B	Yes	GC content percentage calculation. Alignment to the 3'SS. Sliding window size is 40bp.	-0.260419	24	0.000446891	0.01	-0.212733	45	0.0492395	N/A	-0.420905	34	2.94369e-05	0.005	-0.27093	24	0.000254345	0.005	-0.215449	37	0.0463467	N/A	-0.440224	24	1.12746e-05	0.005			1	9.132e-07
GC RA Win C	Yes	GC content percentage calculation. Alignment to the 3'SS. Sliding window size is 50bp.	-0.2734	35	0.000222041	0.005	-0.212733	65	0.0492395	N/A	-0.450008	46	6.7787e-06	0.005	-0.257609	35	0.00051756	0.02	-0.214326	59	0.047526	N/A	-0.442184	44	1.01949e-05	0.005			1	9.2593e-07
Mot Clan 1	Yes	Homer motif analysis clan number (Average Spliced High vs. Not Spliced). Motifs 1-9.	0.281974	6	0.000137196	0.005	0.298353	6	0.00526797	0.01	0.4997	5	3.95625e-07	0.005	0.28697	6	0.000102884	0.005	0.376131	6	0.000358257	0.005	0.48136	5	1.18954e-06	0.005			N/A	N/A
Mot Clan 2	Yes	Homer motif analysis clan number (Average Spliced High 40 vs. Not Spliced). Motifs 10-19.	0.280747	1	0.000147125	0.005	0.289642	10	0.00683115	0.08	0.358509	1	0.000449648	0.005	0.227277	1	0.00228147	0.02	0.353089	10	0.000854237	0.01	0.318913	1	0.00194558	0.02			N/A	N/A
Mot Clan 3	Yes	Homer motif analysis clan number (Average Spliced Ribosomal High 20 vs. Not Spliced). Motifs 20-29.	0.198599	8	0.00787232	0.08	0.374883	8	0.000376151	0.005	--	--	N/S	N/A	0.19586	8	0.00879	0.04	0.375827	8	0.000362549	0.005	0.236466	1	0.0232453	N/A			N/A	N/A
Mot Clan 4	Yes	Homer motif analysis clan number (Average Spliced Non-Ribosomal High vs. Not Spliced). Motifs 30-39.	0.200234	5	0.00736606	0.05	--	--	N/S	N/A	0.432378	2	1.67659e-05	0.005	0.201241	5	0.00706867	0.04	--	--	N/S	N/A	0.403448	2	6.67138e-05	0.005			N/A	N/A
Mot Clan 5	Yes	Homer motif analysis clan number (Average Spliced Non-Ribosomal High 20 vs. Not Spliced). Motifs 40-49.	0.242892	4	0.00108765	0.02	0.269716	4	0.0120262	N/A	0.33746	2	0.00100329	0.02	0.232553	4	0.00178581	0.01	0.290692	4	0.00662311	0.06	0.353908	8	0.000538423	0.01			N/A	N/A
Mot Clan 6	Yes	Homer motif analysis clan number (Average Spliced Non-Ribosomal High 40 vs. Not Spliced). Motifs 50-60.	0.263813	4	0.000373479	0.005	0.214666	5	0.0471665	N/A	0.342612	4	0.000828549	0.02	0.253015	4	0.000655679	0.01	0.205982	4	0.0570786	N/A	0.321858	4	0.00175617	0.01			N/A	N/A
Mot Clan 7	Yes	Homer motif analysis clan number (Maximal Spliced High 40 vs. Not Spliced). Motifs 61-69.	0.323185	6	1.08196e-05	0.005	0.315267	6	0.00310971	0.01	0.343291	6	0.000807738	0.005	0.268686	6	0.000287431	0.005	0.267381	6	0.0128175	N/A	0.299668	6	0.00370762	0.06			N/A	N/A
Mot Clan 8	Yes	Homer motif analysis clan number (Maximal Spliced Ribosomal High vs. Not Spliced). Motifs 70-80.	0.245036	8	0.000978748	0.005	0.32078	8	0.00260157	0.03	0.251827	8	0.0154534	N/A	0.234692	8	0.00161443	0.005	0.322263	8	0.00247831	0.05	0.266017	8	0.0103766	N/A			N/A	N/A
Mot Clan 9	Yes	Homer motif analysis clan number (Maximal Spliced Ribosomal High 20 vs. Not Spliced). Motifs 81-92 .	0.178602	3	0.0170667	N/A	0.316282	3	0.00301003	0.02	0.279461	5	0.00697941	0.01	0.184643	3	0.0136121	N/A	0.338916	3	0.00141285	0.02	0.29315	5	0.00456914	0.06			N/A	N/A
Mot Clan 10	Yes	Homer motif analysis clan number (Maximal Spliced Non-Ribosomal High 20 vs. Not Spliced). Motifs 93-102.	0.237255	8	0.00142898	0.01	--	--	N/S	N/A	0.38631	1	0.000142689	0.005	0.257067	8	0.000532323	0.005	--	--	N/S	N/A	0.415579	8	3.79651e-05	0.005			N/A	N/A
Mot Clan 11	Yes	Homer motif analysis clan number (Average Spliced: High vs. Low). Motifs 103-110.	0.26903	2	0.000282108	0.005	0.232357	5	0.031333	N/A	0.444043	2	9.2612e-06	0.005	0.214569	2	0.00402596	0.03	0.243756	4	0.0237191	N/A	0.399994	2	7.80226e-05	0.005			N/A	N/A
Mot Clan 12	Yes	Homer motif analysis clan number (Average Spliced: High 40 vs. Low). Motifs 111-118.	0.295496	1	6.21697e-05	0.005	0.231099	1	0.0322876	N/A	0.353547	1	0.00054603	0.01	0.289884	1	8.67666e-05	0.005	0.251597	4	0.0194496	N/A	0.354556	1	0.000525008	0.005			N/A	N/A
Mot Clan 13	Yes	Homer motif analysis clan number (Average Spliced Complementary: Low 40 vs. High). Motifs 119-129.	0.162601	9	0.0301184	N/A	0.306619	7	0.00408704	0.005	0.245345	9	0.0184112	N/A	-0.166579	10	0.0262612	N/A	0.300656	7	0.0049118	0.05	0.235493	9	0.0238354	N/A			N/A	N/A
Mot Clan 14	Yes	Homer motif analysis clan number (Maximal Spliced: High 40 vs. Low). Motifs 130-140.	0.251583	3	0.000705231	0.01	0.320873	3	0.00259372	0.03	0.402303	2	7.02804e-05	0.005	0.222924	3	0.00278112	0.01	0.307632	3	0.00395984	0.05	0.3753	2	0.0002276	0.005			N/A	N/A
Mot Clan 15	Yes	Homer motif analysis clan number (Maximal Spliced Complementary: Low 40 vs. High). Motifs 141-151.	-0.167459	4	0.0254674	N/A	--	--	N/S	N/A	-0.29887	4	0.00380467	0.04	-0.187928	4	0.0120037	N/A	--	--	N/S	N/A	-0.269902	4	0.00927107	0.04			N/A	N/A
Mot Clan 16	Yes	Homer motif analysis clan number (Average Spliced Ribosomal: High vs. Low). Motifs 152-160.	0.197514	1	0.008225	0.04	0.312215	1	0.00342766	0.03	0.218679	3	0.0362389	N/A	0.185411	1	0.0132198	N/A	0.314434	1	0.00319381	0.02	--	--	N/S	N/A			N/A	N/A
Mot Clan 17	Yes	Homer motif analysis clan number (Average Spliced Ribosomal Complementary: Low vs. High). Motifs 161-170.	-0.183469	3	0.0142309	N/A	-0.272833	1	0.0110366	N/A	0.348695	8	0.000658239	0.01	-0.182412	3	0.014809	N/A	-0.312433	1	0.00340402	0.02	0.26129	8	0.0118761	N/A			N/A	N/A
Mot Clan 18	Yes	Homer motif analysis clan number (Average Spliced No-Ribosomal Complementary: Low vs. High). Motifs 171-179.	-0.148074	1	0.0485505	N/A	--	--	N/S	N/A	--	--	N/S	N/A	-0.173041	1	0.0208971	N/A	--	--	N/S	N/A	--	--	N/S	N/A			N/A	N/A
Mot Clan 19	Yes	Homer motif analysis clan number (Max Spliced No-Ribosomal Complementary: Low vs. High). Motifs 180-187.	-0.158278	2	0.0348468	N/A	0.22116	1	0.0407215	N/A	-0.213659	1	0.0408542	N/A	-0.160867	2	0.0319451	N/A	0.219612	1	0.0421865	N/A	-0.226103	1	0.0302196	N/A			N/A	N/A
