# Supplementary material for: Accurate, Model-Based Tuning of Synthetic Gene Expression Using Introns in S. cerevisiae
Source: PLoS Genet. 2014 Jun 26;10(6):e1004407. doi: 10.1371/journal.pgen.1004407 (PMC4072511; doi:10.1371/journal.pgen.1004407)
Supplement: Table S8 — Growth rate outliers. This table shows intron strain growth rate outliers strains that exhibit a growth rates that are more than two standard deviations from the mean, per condition (showed for Rapamycin, AA starvation and KCL). (XLSX) [file pgen.1004407.s018.xlsx]

## Sheet: Sheet1
SD Complete	Growth Level						Remarks
	mCherry (Avg)	mCherry (Std)	YFP-WT (Avg)	YFP-WT (Std)	YiFP (Avg)	YiFP (Std)	Growth level values are in OD/minute
Duplicate 1	0.183756	0.0154109	0.178575	0.0193045	0.176015	0.022453
Duplicate 2	0.166472	0.0201985	0.166588	0.0278158	0.164605	0.0246648
Duplicate 3	0.16251	0.0120293	0.165138	0.0147026	0.161209	0.0164129
Duplicate 4	0.164678	0.0416392	0.178273	0.0198023	0.174779	0.0202798

## Sheet: Sheet2
	Growth Rate Outliers
	AA Starvation		Rapamycin		KCL
	YiFP (Avg)	YiFP (Std)	YiFP (Avg)	YiFP (Std)	YiFP (Avg)	YiFP (Std)
	0.139556	0.0121366	0.066026	0.0106615	0.107077	0.0109679
	Gene name		Gene name		Gene name
	YDL130W		YDR450W		YKL186C
	YER003C		YDL137W		YML025C
	YGL183C		YGR214W		YLR287C-A
	YGL103W		YGR029W		YNL147W
	YOR234C		YMR201C		YDL115C
	YNL147W		YDR064W		YGL031C
	YPR063C		YKL157W		YJL041W
	YNR053C		YKL156W		YIL069C
	YBL040C		YLR211C		YDR450W
	YER093C-A		YLR287C-A		YER117W
	YDR471W		YNL312W		YBL040C
	YBL092W		YLR367W		YCR097W
	YHR016C		YPL075W		YAL030W
	YHR203C		YPL198W		YDL136W
	YGR225W		YPR063C		YER003C
	YGR034W		YOR312C		YGL033W
	YGL226C-A		YBR181C		YEL012W
	YIL111W		YFL039C		YGL103W
	YPL075W				YLR426W
	YOL047C				YOL127W
	YHR001W-A				YPL198W
	YHR041C				YDL219W
	YDR450W
	Total	0	Total	0	Total	0
	%	0	%	0	%	0
